# Supplementary material for: A porous and air gap elastomeric dielectric layer for wearable capacitive pressure sensor with high sensitivity and a wide detection range
Source: Royal Society of Chemistry journal article supplement (doi:10.1039/d0tc00443j), 2020-01-01
Supplement: d0tc00443j1.pdf [file d0tc00443j1.pdf]

## Porous and Air Gap Elastomeric Dielectric Layer for Wearable Capacitive Pressure Sensor with High Sensitivity and Wide Detection Range

Wei Li,<sup>a,†</sup> Xin Jin,<sup>b,†</sup> Yide Zheng,<sup>a</sup> Xudong Chang,<sup>a</sup> Wenyu Wang,<sup>\*,a</sup> Tong Lin,<sup>c</sup> Fan Zheng,<sup>d</sup>  
Obiora Onyilagh,<sup>d</sup> Zhengtao Zhu<sup>\*,d</sup>

<sup>a</sup>. School of Textile Science and Engineering, Tiangong University, Tianjin 300387, China.

<sup>b</sup>. School of Materials Science and Engineering, Tiangong University, Tianjin 300387, China.

<sup>c</sup>. Institute for Frontier Materials, Deakin University, Geelong, Victoria 3216, Australia.

<sup>d</sup>. Department of Chemistry, Biology, and Health Sciences, South Dakota School of Mines & Technology, Rapid City, South Dakota 57701, United States.

† Both authors contributed equally to the manuscript.

\*Corresponding authors: [wwwy-322@126.com](mailto:wwwy-322@126.com); [zhengtao.zhu@sdsmt.edu](mailto:zhengtao.zhu@sdsmt.edu)

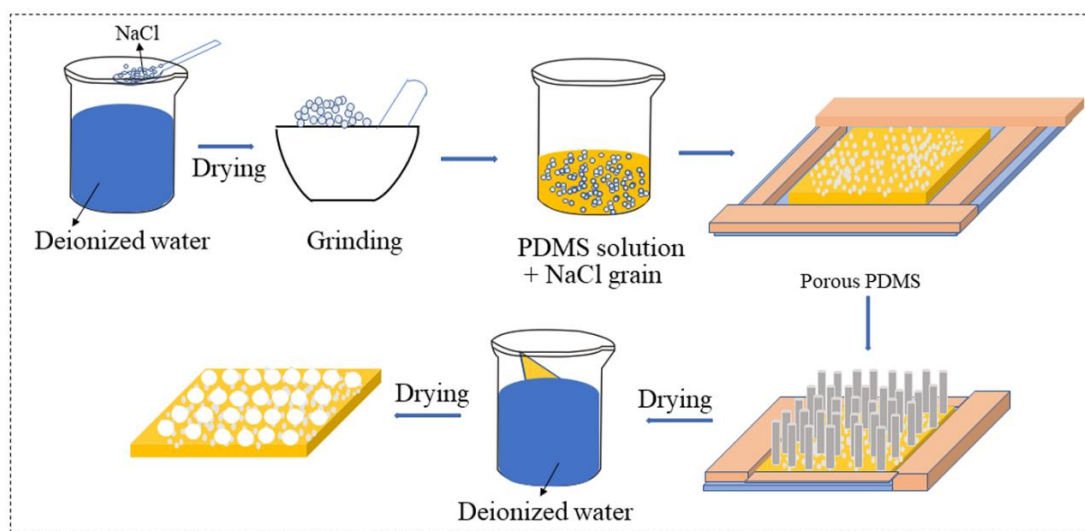

Figure S1. Preparation of the agp-PDMS.

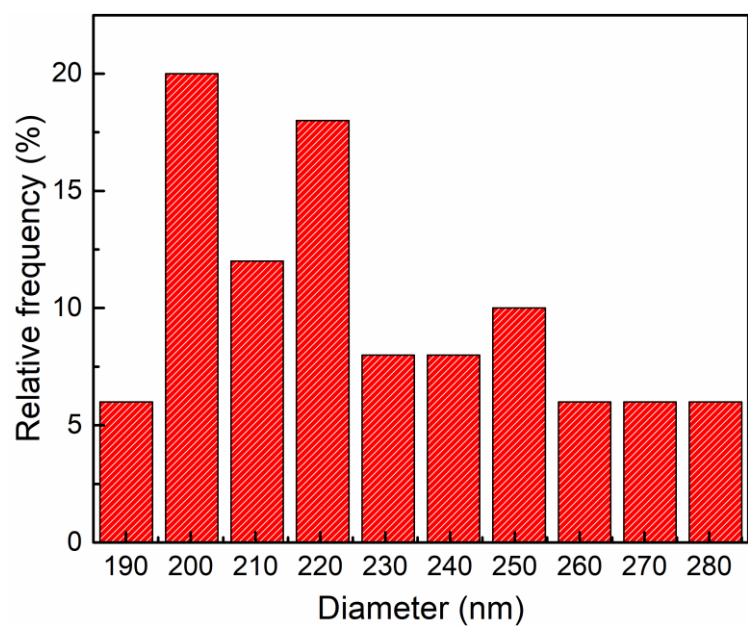

Figure S2. Histogram of the diameters of the PPy particles deposited on filter paper by vapor polymerization.

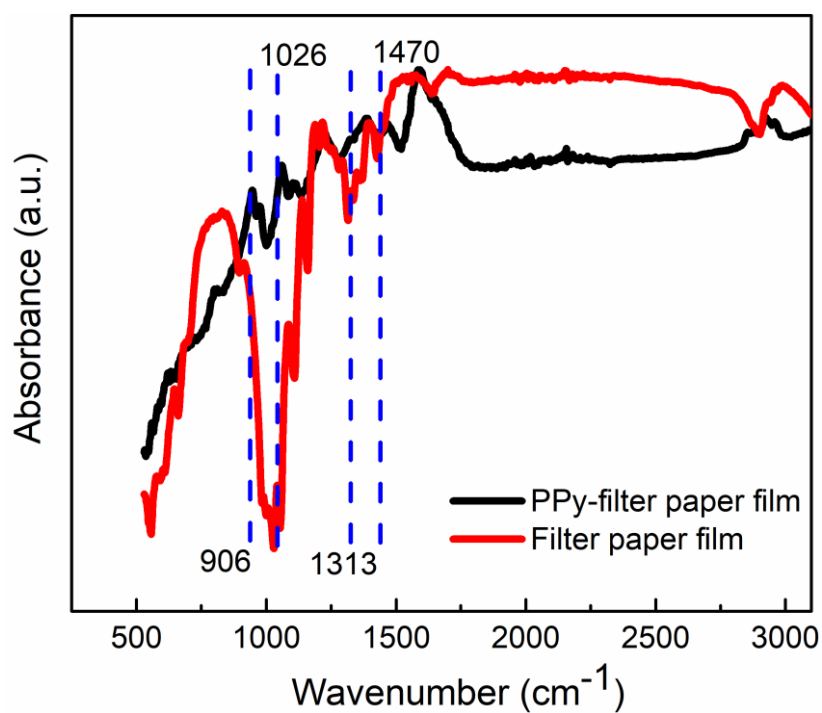

Figure S3. FT-IR spectra of the filter paper and the PPy/filter paper.

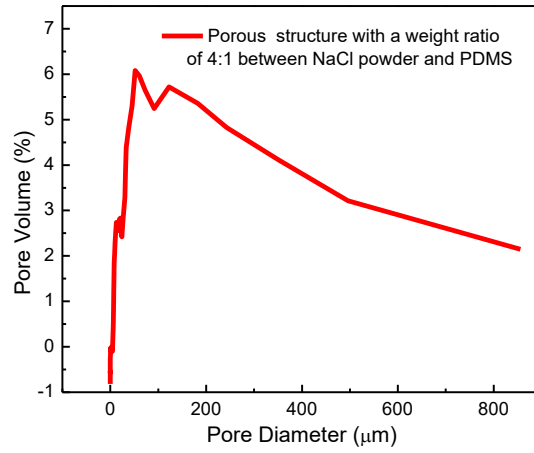

Figure S4. Pore size distribution of PDMS-h.

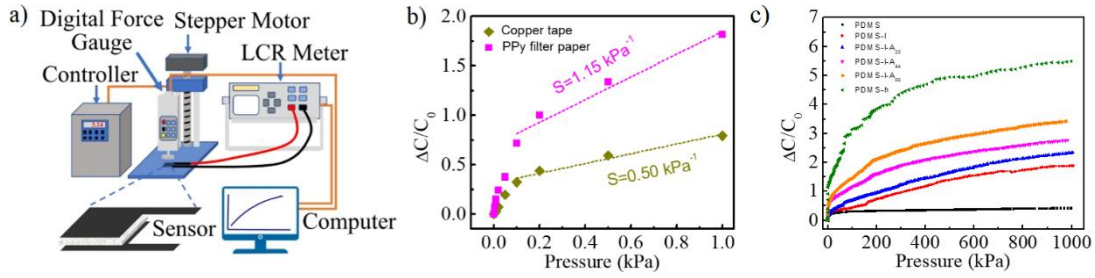

Figure S5. (a) Schematic of the capacitive sensor testing setup. (b) Comparison of the sensors based on PDMS-h-A<sub>66</sub> under small pressure using PPy filter paper or copper tape as electrode contacts. (c) The relative capacitance change  $\Delta C/C_0$  as a function of applied pressure for devices based on solid PDMS, PDMS-l (30.4% porosity), PDMS-l-A<sub>22</sub> (array of 2×2 holes), PDMS-l-A<sub>44</sub> (array of 4×4 holes), PDMS-l-A<sub>66</sub> (array of 6×6 holes), and PDMS-h (61.2% porosity).

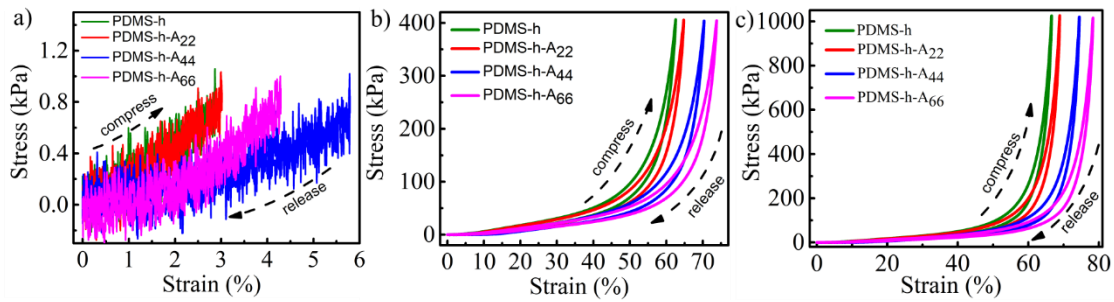

Figure S6. The curve of stress-compressive strain of applied pressure at small (5~1 kPa), intermediate (1~400 kPa), and large pressure ranges (400~1000 kPa), respectively.
